# Supplementary material for: Interleukin-6 Induces Stem Cell Propagation through Liaison with the Sortilin–Progranulin Axis in Breast Cancer
Source: MDPI journal article supplement (doi:10.3390/cancers15245757), 2023-12-08
Supplement: s1 [file s1]

Article

**Interleukin-6 induces stem cell propagation through liaison with the sortilin-progranulin axis in breast cancer**

Figure 2, supporting file: Whole gel WB images.

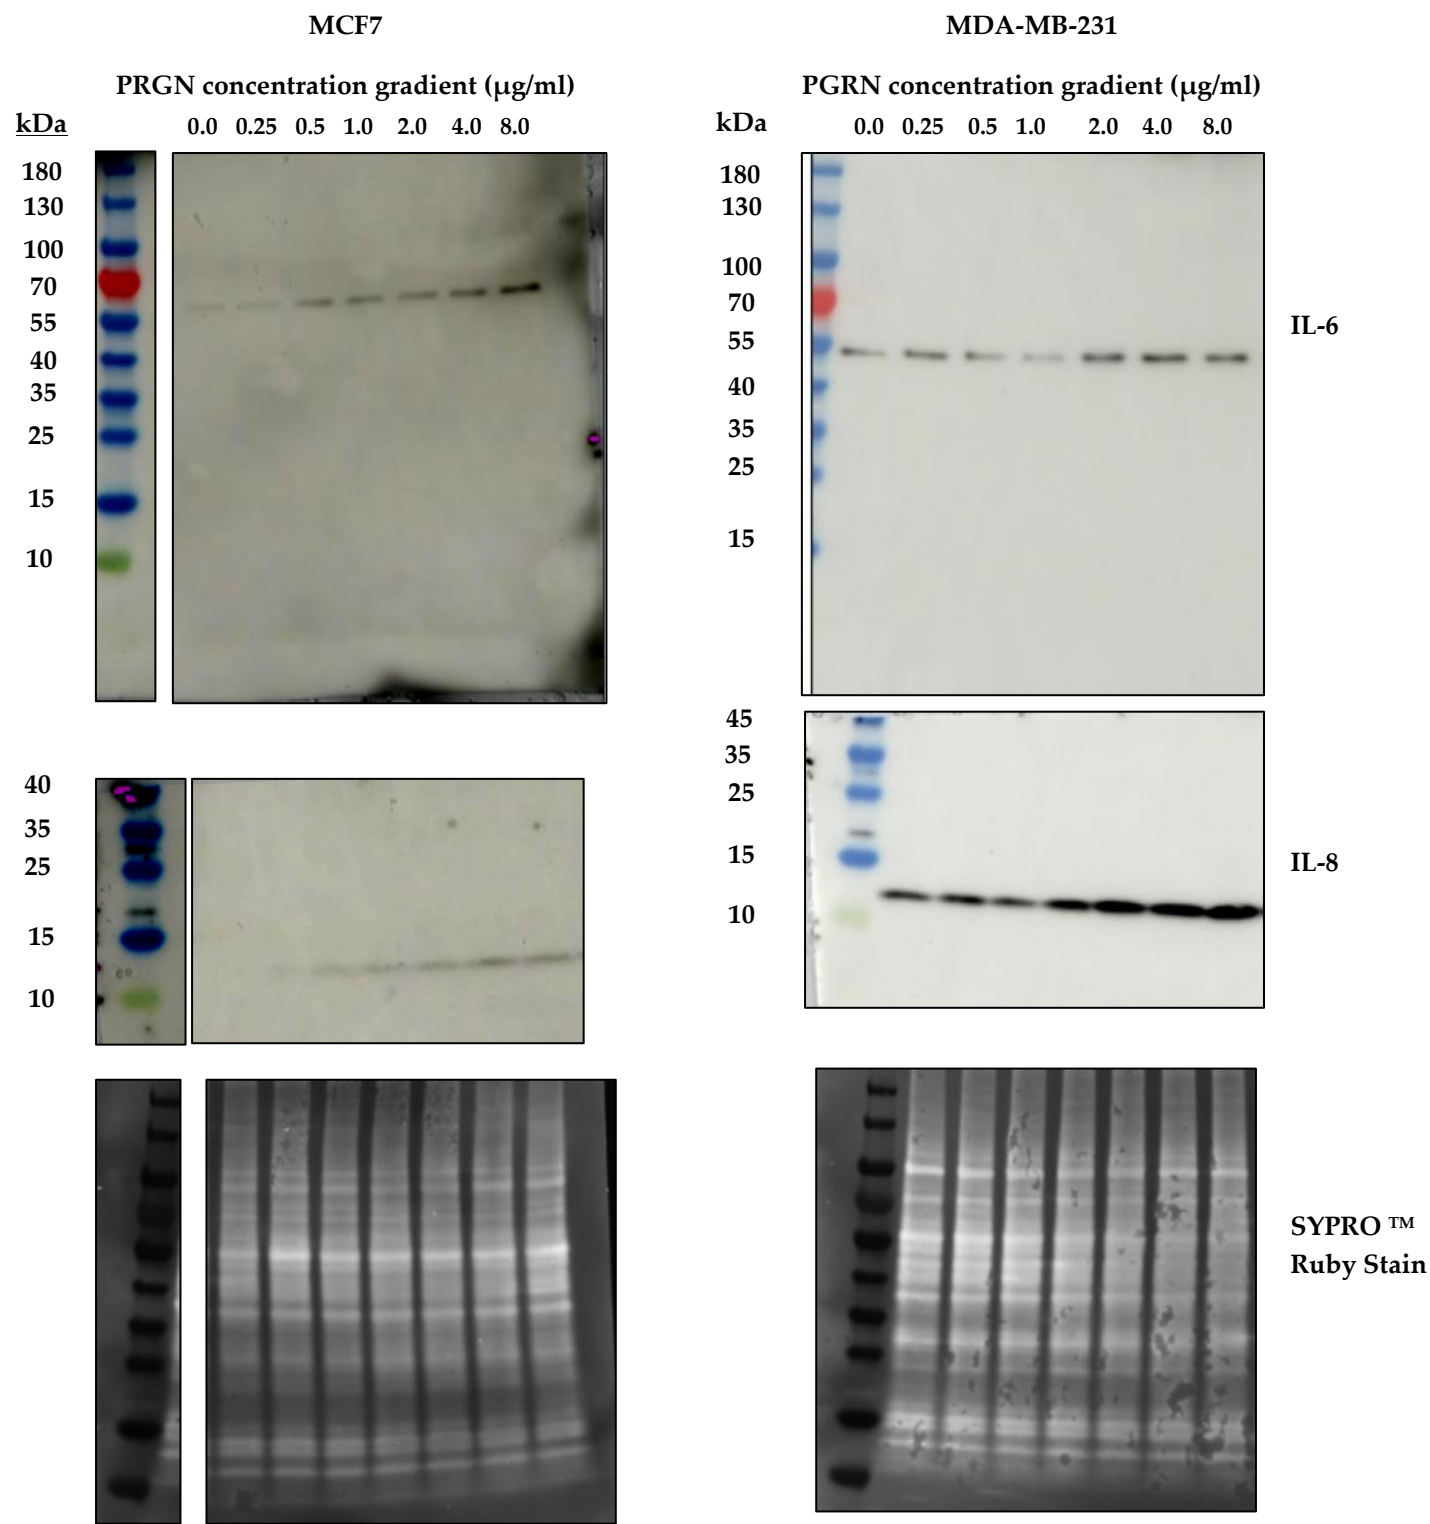

MCF7

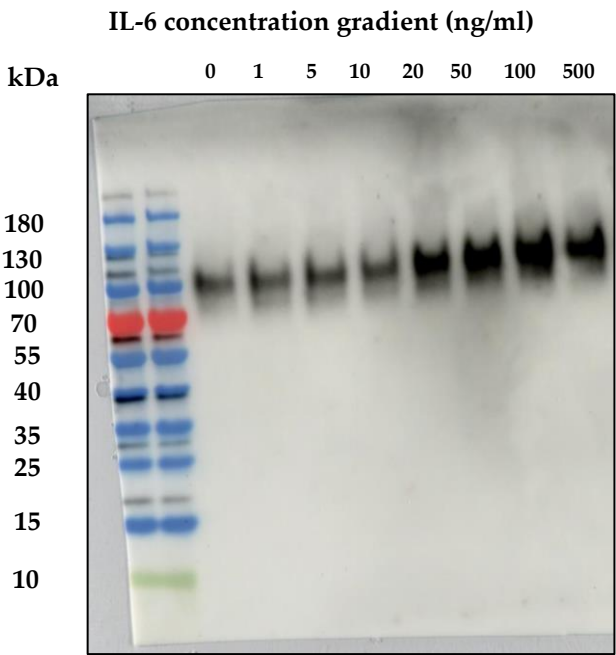

MDA-MB-231

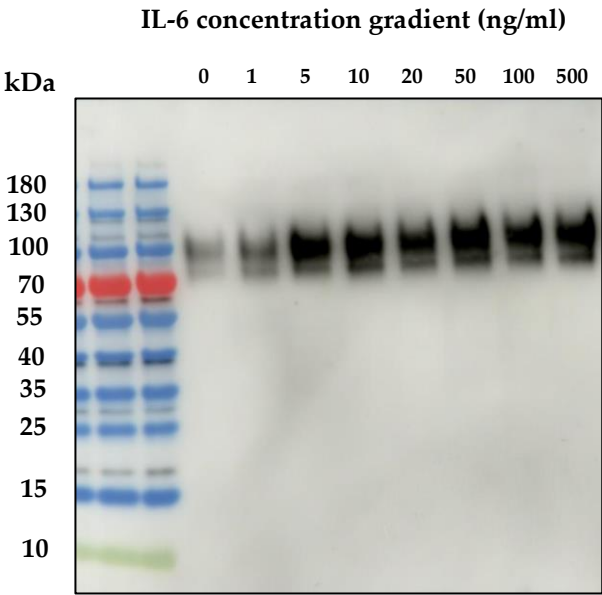

PRGN

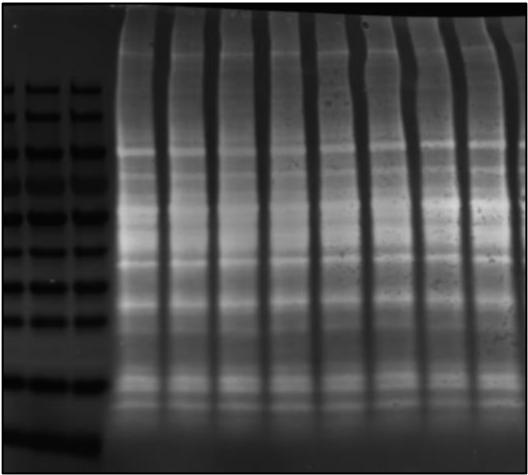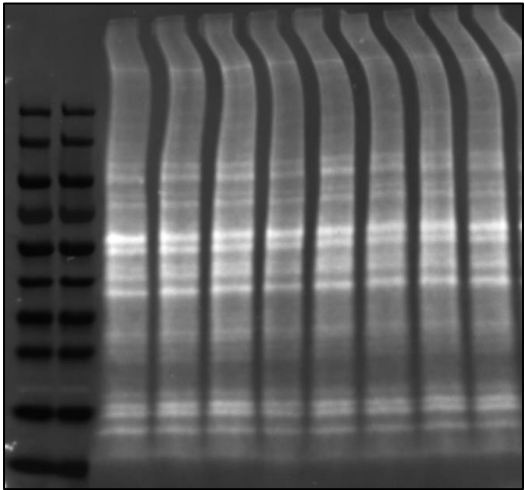

SYPRO<sup>TM</sup>  
Ruby Stain

## MCF7

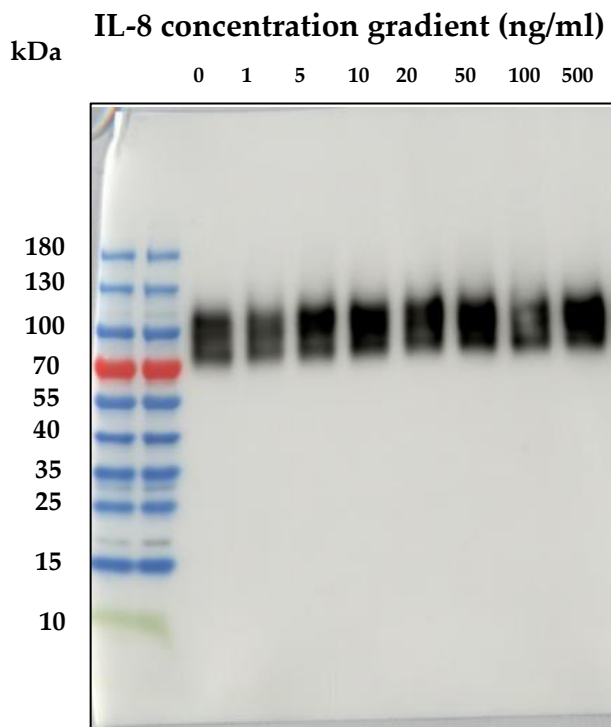

## MDA-MB-231

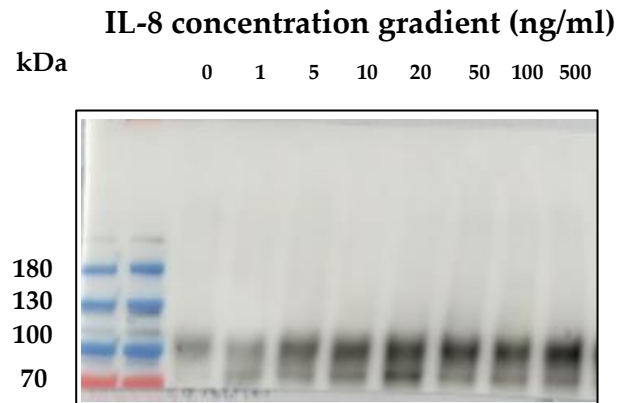

PRGN

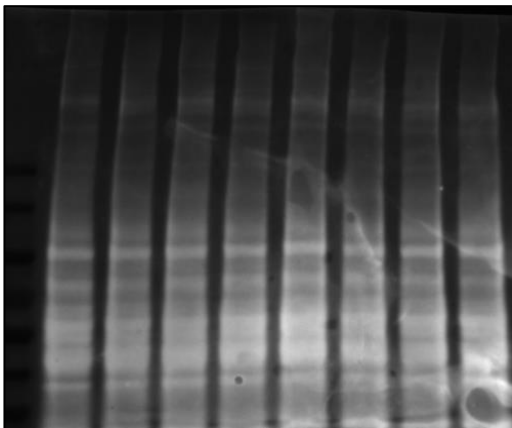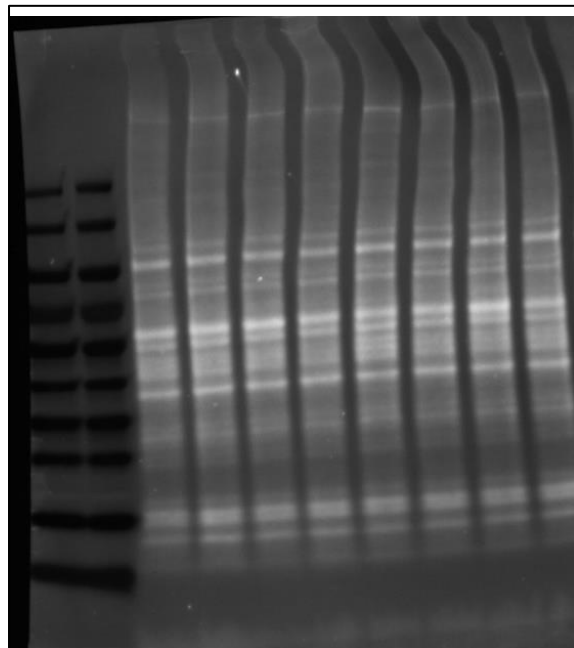

SYPRO<sup>TM</sup>  
Ruby Stain
